# Supplementary material
Source: PubMed Central journal article supplement (PMC8720651)
Supplement: mmc1.pdf [file mmc1.pdf]

# Chiropractic Services

## Military Health System and Veterans Health Administration

Green BN, Dunn A. Title of Paper Goes Here. J Chiropr Humanit. 2021

### What Healthcare System?

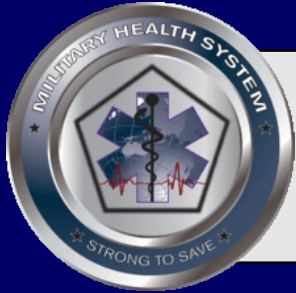

Military Health System

Veterans Health Administration

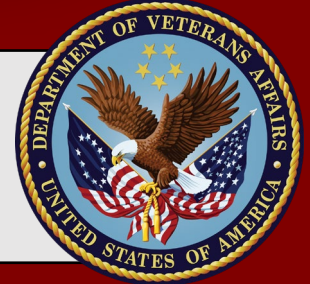

### Who is served?

Active-duty military members

Veterans

### What is the Healthcare System?

Second largest US healthcare system  
\$50 billion operating budget  
515 hospitals/clinics  
60 chiropractic facilities  
100 chiropractors  
Chiropractic care available on base

Largest US healthcare system  
\$72 billion operating budget  
1283 hospitals/clinics  
190 chiropractic facilities  
300 chiropractors  
Chiropractic care available on-station and in community

### How much is chiropractic used?

350,000 chiropractic visits annually  
1 chiropractor per 14,000 service members

70,000 chiropractic visits annually  
1 chiropractor per 30,000 service members

### How is chiropractic integrated?

Incorporated into various departments and care programs with other health professionals

Incorporated into various departments and care programs with other health professionals

### Why is chiropractic inclusion beneficial?

Helps keep service members fit for duty  
Chiropractic care provides the option to manage injuries without use of medication

Helps manage chronic musculoskeletal conditions  
Pain management without use of opioids  
Focus on function and daily activities
